# Supplementary material for: A Matrigel-based 3D construct of SH-SY5Y cells models the α-synuclein pathologies of Parkinson's disease
Source: Oxford University Press journal article supplement (doi:10.1242/dmm.049125), 2022-01-13
Supplement: dmm049125supp.pdf [file dmm049125supp.pdf]

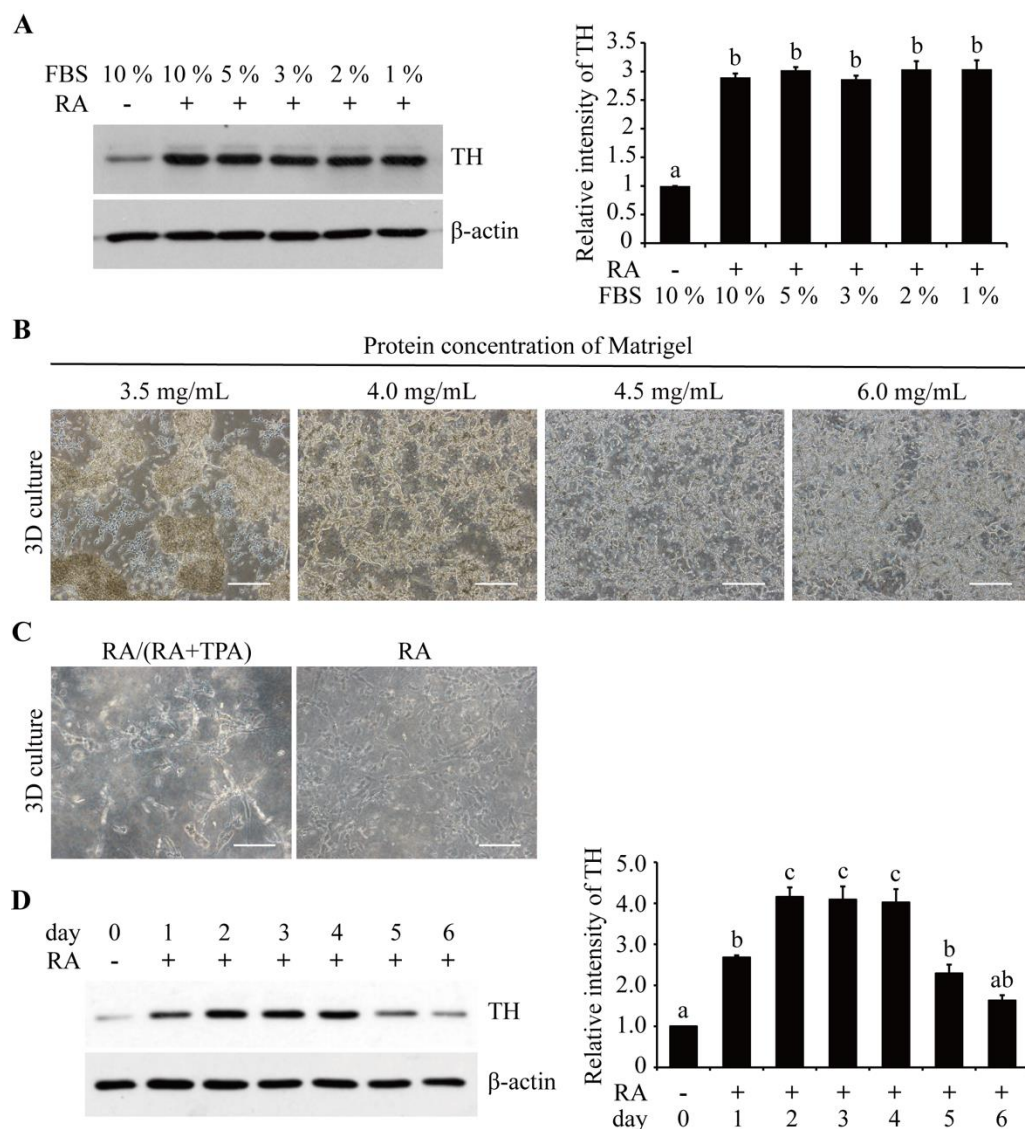

**Fig. S1. Optimization of SH-SY5Y cell cultures.** (A) SH-SY5Y cells were 2D cultured and treated with 10  $\mu$ M RA for 3 days in media containing different concentrations of FBS. (B) Bright-field images of SH-SY5Y cells in 3D constructs with different concentrations of Matrigel. The constructs were cultured for 6 days in a differentiation medium containing 10  $\mu$ M RA and 1% FBS. Bar size, 200  $\mu$ m. (C) Bright-field images of cells in 3D constructs with 4.5 mg/mL of Matrigel. The constructs were cultured in a medium containing 1% FBS with two different differentiation inducers, that is, 10  $\mu$ M RA for 6 days (RA) or 10  $\mu$ M RA for 3 days followed by 10  $\mu$ M RA and 80 nM TPA for 3 days [RA/(RA+TPA)]. Bar size, 100  $\mu$ m. (D) Cells were 2D cultured and treated with 10  $\mu$ M RA for different days in a medium containing 1% FBS. TH levels were quantified and normalized to their respective  $\beta$ -actin levels. Values were expressed relative to the one without RA treatment, which was set as 1. Data are means  $\pm$  SE,  $n = 3$ . Statistical analyses were performed using one-way ANOVA, followed by Tukey's post hoc test. Different letters indicate  $p < 0.05$ . FBS, fetal bovine serum; RA, all-trans-retinoic acid; TH, tyrosine hydroxylase; TPA, 12-*O*-tetradecanoylphorbol-13-acetate.

**A**

| The differentially expressed genes in dopaminergic synaptic signal pathway |                                                       |                     |             |                        |
|----------------------------------------------------------------------------|-------------------------------------------------------|---------------------|-------------|------------------------|
| Up-regulated genes (n=12)                                                  |                                                       |                     |             |                        |
| Gene Symbol                                                                | Gene Full Name                                        | Encoded Protein     | Fold change | P value                |
| <i>TH</i>                                                                  | tyrosine hydroxylase                                  | TH                  | 82.77       | $6.20 \times 10^{-69}$ |
| <i>SLC18A1</i>                                                             | solute carrier family 18 member A1                    | VMAT1               | 11.23       | $4.13 \times 10^{-63}$ |
| <i>SLC18A2</i>                                                             | solute carrier family 18 member A2                    | VMAT2               | 5.00        | $2.14 \times 10^{-7}$  |
| <i>KCNJ5</i>                                                               | potassium voltage-gated channel subfamily J member 5  | GIRK4               | 3.89        | $4.92 \times 10^{-4}$  |
| <i>DDC</i>                                                                 | dopa decarboxylase                                    | DDC                 | 3.61        | $2.19 \times 10^{-21}$ |
| <i>PPP1R1B</i>                                                             | protein phosphatase 1 regulatory inhibitor subunit 1B | DARPP32             | 3.45        | $4.68 \times 10^{-2}$  |
| <i>CALY</i>                                                                | calcyon neuron specific vesicular protein             | Calcyon             | 2.64        | $2.92 \times 10^{-6}$  |
| <i>GNG3</i>                                                                | G protein subunit gamma 3                             | Gγ3                 | 2.51        | $3.16 \times 10^{-10}$ |
| <i>GNAS</i>                                                                | GNAS complex locus                                    | G <sub>s</sub> α    | 2.44        | $4.05 \times 10^{-13}$ |
| <i>PRKCG</i>                                                               | protein kinase C gamma                                | PKCγ                | 2.44        | $1.85 \times 10^{-4}$  |
| <i>ITPR3</i>                                                               | inositol 1,4,5-trisphosphate receptor type 3          | IP3R3               | 2.35        | $5.14 \times 10^{-4}$  |
| <i>GNAO1</i>                                                               | G protein subunit alpha o1                            | G <sub>o1</sub> α   | 2.15        | $3.48 \times 10^{-5}$  |
| Down-regulated genes (n=4)                                                 |                                                       |                     |             |                        |
| Gene Symbol                                                                | Gene Full Name                                        | Encoded Protein     | Fold change | P value                |
| <i>DRD5</i>                                                                | dopamine receptor D5                                  | D5                  | 0.09        | $3.85 \times 10^{-7}$  |
| <i>ITPR2</i>                                                               | inositol 1,4,5-trisphosphate receptor type 2          | IP3R2               | 0.33        | $2.61 \times 10^{-6}$  |
| <i>CACNA1D</i>                                                             | calcium voltage-gated channel subunit alpha 1 D       | Ca <sub>v</sub> 1.3 | 0.34        | $7.16 \times 10^{-7}$  |
| <i>GRIA2</i>                                                               | glutamate ionotropic receptor AMPA type subunit 2     | AMPA2               | 0.50        | $7.18 \times 10^{-6}$  |

**B**

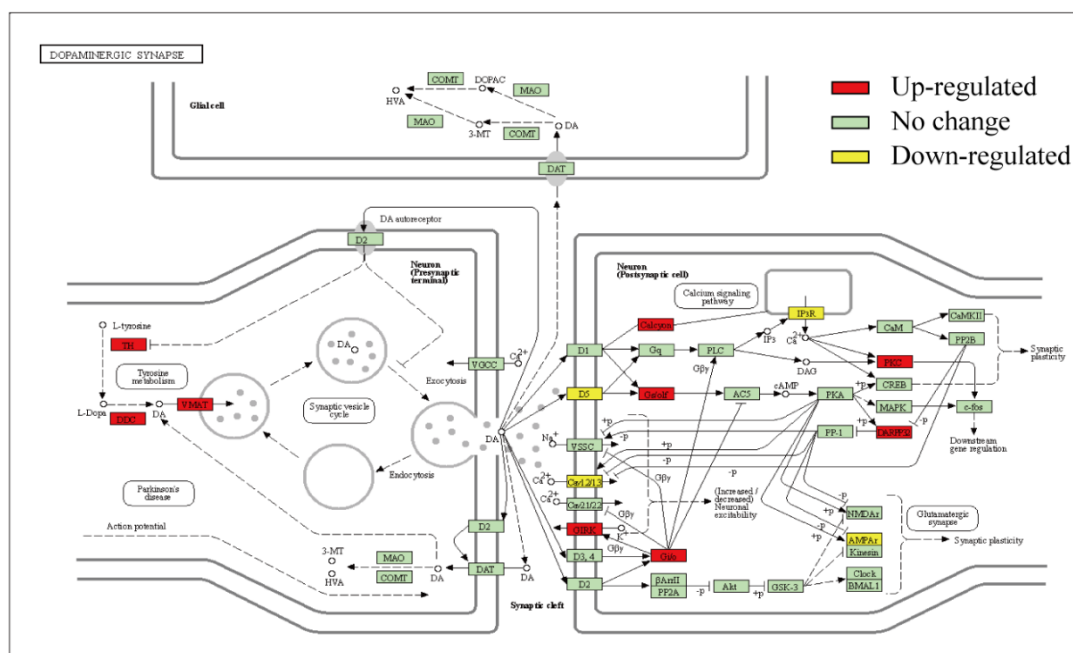

**Fig. S2. Dopaminergic synaptic signal pathway analysis.** (A) The differentially expressed genes in cells of 3D versus those of 2D in the dopaminergic synaptic signal pathway. (B) Dopaminergic synaptic signal pathway diagram by KEGG analysis.

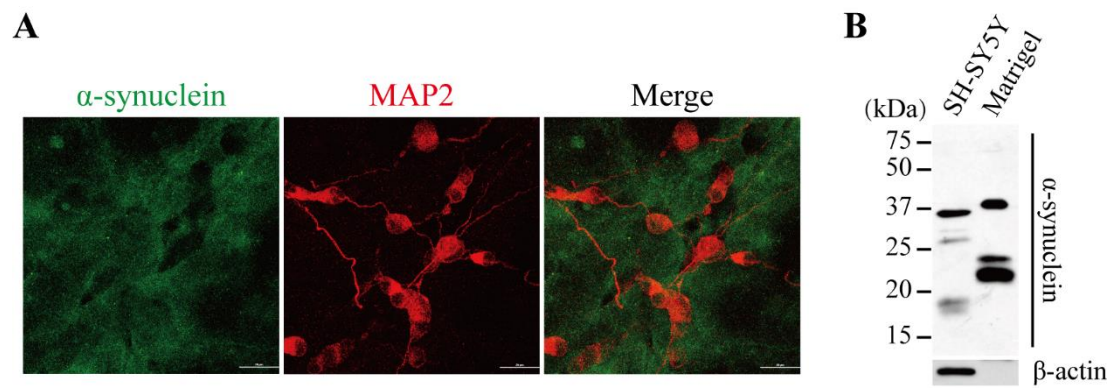

**Fig. S3. Matrigel and  $\alpha$ -synuclein.** (A) Immunofluorescence staining of  $\alpha$ -synuclein using the 3D constructs. Green,  $\alpha$ -synuclein; red, MAP2. Bar size, 20  $\mu$ m. (B) Western blot analysis of  $\alpha$ -synuclein using SH-SY5Y cells and Matrigel, respectively.

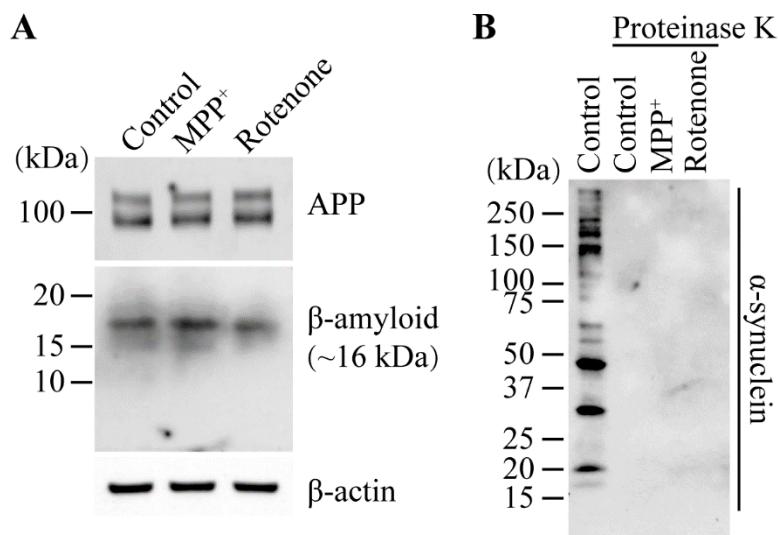

**Fig. S4. Western blot analyses of  $\beta$ -amyloid (A) and proteinase K resistant  $\alpha$ -synuclein (B) expression in the RA-treated 3D cultures.** Cells were treated with 10  $\mu$ M MPP<sup>+</sup> or 0.5  $\mu$ M rotenone for 24 h. For (B), total cell lysates were treated with 5  $\mu$ g/mL proteinase K at 37 °C for 30 min. APP, amyloid precursor protein;  $\beta$ -amyloid monomer is at about 4 kDa.

**Table S1. Results of all statistical analyses undertaken**

| Figure #                 | Method           | Results                                          |                  |                                          |                  |
|--------------------------|------------------|--------------------------------------------------|------------------|------------------------------------------|------------------|
| <b>Figure 1</b>          | Factorial ANOVA  | Figure 1C                                        |                  |                                          |                  |
|                          |                  | 3D                                               | RA               | 3D * RA+                                 |                  |
|                          |                  | $p = < 0.0001$                                   | $p = < 0.0001$   | $p = 0.0175$                             |                  |
|                          |                  | 2D                                               | 3D               | RA-                                      | RA+              |
|                          |                  | RA- vs RA+                                       | RA- vs RA+       | 2D vs 3D                                 | 2D vs 3D         |
|                          |                  | $p = 0.0002$                                     | $p = < 0.0001$   | $p = < 0.0001$                           | $p = < 0.0001$   |
| <b>Figure 2</b>          | Student's t-test | Figure 2B (2D vs 3D)                             |                  |                                          |                  |
|                          |                  | DDC                                              | VMAT2            |                                          |                  |
|                          |                  | $p = 0.0052$                                     | $p = 0.0031$     |                                          |                  |
| <b>Figure 3</b>          | Student's t-test | Figure 3A                                        |                  |                                          |                  |
|                          |                  | 2D: $\alpha$ -syn                                |                  |                                          |                  |
|                          |                  | Ctrl vs MPP+                                     |                  | Ctrl vs Rotenone                         |                  |
|                          |                  | monomer/LMW                                      | HMW              | monomer/LMW                              | HMW              |
|                          |                  | $p = 0.0092$                                     | $p = 0.1057$     | $p = 0.0839$                             | $p = 0.2179$     |
|                          |                  | 3D: $\alpha$ -syn                                |                  |                                          |                  |
|                          |                  | Ctrl vs MPP+                                     |                  | Ctrl vs Rotenone                         |                  |
|                          |                  | monomer/LMW                                      | HMW              | monomer/LMW                              | HMW              |
|                          |                  | $p = 0.4711$                                     | $p = 0.5539$     | $p = 0.3098$                             | $p = 0.7274$     |
|                          |                  | Figure 3B                                        |                  |                                          |                  |
|                          |                  | 2D: pS129- $\alpha$ -syn                         |                  |                                          |                  |
|                          |                  | Ctrl vs MPP+                                     |                  | Ctrl vs Rotenone                         |                  |
|                          |                  | monomer/LMW                                      | HMW              | monomer/LMW                              | HMW              |
|                          |                  | $p = 0.5166$                                     | $p = 0.8379$     | $p = 0.0916$                             | $p = 0.0095$     |
| 3D: pS129- $\alpha$ -syn |                  |                                                  |                  |                                          |                  |
| Ctrl vs MPP+             |                  | Ctrl vs Rotenone                                 |                  |                                          |                  |
| monomer/LMW              | HMW              | monomer/LMW                                      | HMW              |                                          |                  |
| $p = 0.0410$             | $p = 0.0074$     | $p = 0.0429$                                     | $p = 0.0134$     |                                          |                  |
| <b>Figure 4</b>          | Student's t-test | Figure 4A (2D: $\alpha$ -syn)                    |                  | Figure 4B (3D: $\alpha$ -syn aggregates) |                  |
|                          |                  | Ctrl vs MPP+                                     | Ctrl vs Rotenone | Ctrl vs MPP+                             | Ctrl vs Rotenone |
|                          |                  | $p = 0.0042$                                     | $p = 0.0636$     | $p = 0.0039$                             | $p = 0.0010$     |
|                          |                  | Figure 4C (3D: insoluble $\alpha$ -syn fraction) |                  |                                          |                  |
|                          |                  | Ctrl vs MPP+                                     | Ctrl vs Rotenone |                                          |                  |
|                          |                  | $p = < 0.0001$                                   | $p = 0.0032$     |                                          |                  |
| <b>Figure 5</b>          | Student's t-test | Figure 5A (3D: LB509+ cells)                     |                  |                                          |                  |
|                          |                  | Ctrl vs MPP+                                     | Ctrl vs Rotenone |                                          |                  |
|                          |                  | $p = 0.0001$                                     | $p = 0.0004$     |                                          |                  |
| <b>Figure 6</b>          | Student's t-test | Figure 6A (pS129- $\alpha$ -syn+ cells)          |                  | Figure 6B (Ubiquitin+ cells)             |                  |
|                          |                  | Ctrl vs MPP+                                     | Ctrl vs Rotenone | Ctrl vs MPP+                             | Ctrl vs Rotenone |
|                          |                  | $p = 0.0430$                                     | $p = 0.0350$     | $p = 0.0342$                             | $p = 0.0466$     |
|                          |                  | Figure 6C ( $\beta$ -amyloid+ cells)             |                  | Figure 6D (Thioflavin-S+ cells)          |                  |

|                  |               | Ctrl vs MPP+   | Ctrl vs Rotenone | Ctrl vs MPP+   | Ctrl vs Rotenone |
|------------------|---------------|----------------|------------------|----------------|------------------|
|                  |               | $p = 0.0039$   | $p = 0.0017$     | $p = 0.0001$   | $p = 0.0007$     |
| <b>Figure S1</b> | One-way ANOVA | Figure S1A     |                  |                |                  |
|                  |               | 10% FBS        |                  | RA+ (FBS)      |                  |
|                  |               | RA- vs RA+     | 10% vs 5%        | 10% vs 3%      | 10% vs 2%        |
|                  |               | $p = < 0.0001$ | $p = 0.7768$     | $p = 0.9994$   | $p = 0.6792$     |
|                  |               |                | 10% vs 1%        | 5% vs 3%       | 5% vs 2%         |
|                  |               |                | $p = 0.6708$     | $p = 0.5994$   | $p = > 0.9999$   |
|                  |               |                | 5% vs 1%         | 3% vs 2%       | 3% vs 1%         |
|                  |               |                | $p = > 0.9999$   | $p = 0.4982$   | $p = 0.4901$     |
|                  |               |                | 2% vs 1%         |                |                  |
|                  |               |                | $p = > 0.9999$   |                |                  |
|                  |               | Figure S1D     |                  |                |                  |
|                  |               | 0 d vs 1 d     | 0 d vs 2 d       | 0 d vs 3 d     | 0 d vs 4 d       |
|                  |               | $p = 0.0072$   | $p = < 0.0001$   | $p = < 0.0001$ | $p = < 0.0001$   |
|                  |               | 0 d vs 5 d     | 0 d vs 6 d       | 1 d vs 2 d     | 1 d vs 3 d       |
| $p = 0.0475$     | $p = 0.6385$  | $p = 0.0197$   | $p = 0.0271$     |                |                  |
| 1 d vs 4 d       | 1 d vs 5 d    | 1 d vs 6 d     | 2 d vs 3 d       |                |                  |
| $p = 0.0378$     | $p = 0.9358$  | $p = 0.1430$   | $p = > 0.9999$   |                |                  |
| 2 d vs 4 d       | 2 d vs 5 d    | 2 d vs 6 d     | 3 d vs 4 d       |                |                  |
| $p = > 0.9999$   | $p = 0.0030$  | $p = 0.0002$   | $p = > 0.9999$   |                |                  |
| 3 d vs 5 d       | 3 d vs 6 d    | 4 d vs 5 d     | 4 d vs 6 d       |                |                  |
| $p = 0.0041$     | $p = 0.0002$  | $p = 0.0057$   | $p = 0.0003$     |                |                  |
| 5 d vs 6 d       |               |                |                  |                |                  |
| $p = 0.5894$     |               |                |                  |                |                  |

$\alpha$ -syn,  $\alpha$ -synuclein; Ctrl, control

**Table S2. The differentially expressed genes in the 3D cultures compared to the 2D cultures by RNA-sequencing analyses (fold change > 2 and  $p < 0.05$ )**

[Click here to download Table S2](#)
